# Supplementary material
Source: PubMed Central journal article supplement (PMC5566292)
Supplement: AnnalsATS.201611-854OC_clark_data_supplement.pdf [file AnnalsATS.201611-854OC_clark_data_supplement.pdf]

## **Online Data Supplement**

### **The Experience of Patients with Alcohol Misuse after Surviving a Critical Illness: A Qualitative Study**

Brendan J. Clark MD MS, Jacqueline Jones RN PhD FAAN, K. Diandra Reed BS, Rachel Hodapp MSW, Ivor S. Douglas MD, David Van Pelt MD, Ellen L. Burnham MD MS, Marc Moss MD

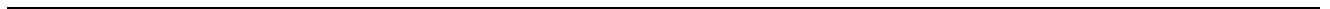

Interview template for Aim #1a (Patient's Perspective)

**Screening**

Can you think of a time when you were most comfortable answering questions about how much and how often you drink in the healthcare setting?

**Probes:** in the ED? The ICU? The general medical floor? Keep the timeframe within 3 months.

**Brief Intervention**

Can you think of a time when you discussed your alcohol use with a healthcare provider? What made you comfortable or uncomfortable?

**Probes:** nurse, doctor, medical assistant

When were you most ready to talk about your alcohol use?

Can you describe how you made plans to change or not change your drinking prior to leaving the hospital?

Describe how friends and family were involved in your plans to address your drinking.

**Referral to Treatment** (for patients with AUDIT 15 or less and no dx of AUD, skip to role of patient navigator)

Can you describe what getting treatment means to you?

Did you enter treatment after discharge from the hospital (if AUDIT > 15)? Why or why not?

What assistance would you need to improve your ability to enter treatment?

What treatment options did you consider?

What treatment options do you wish were available?

Can you describe a time in the hospital when you feel that somebody was judging you because of your drinking?

Can you describe any resources on the internet that you have used?

What is your understanding of the treatment options that are available?

Can you describe a time when you used the internet to look for treatment options for your drinking?

Were you able to successfully cut down/stop drinking? Why/why not?

**Probes:** How is success defined? How does it change over time? How did it change after ICU admission?

Many of the patients we have interviewed have mentioned that their mental health affects their drinking. Do you have depression, anxiety disorder, bipolar disorder or another psychiatric diagnosis? If yes, then. .

Have you sought treatment? Why or why not?

What made it easier or harder to seek treatment?

**Probes:** Do your mental health problems influence how much you drink?

**Role of Patient Navigator**

**Instrumental Support:** In what ways could somebody have assisted you after you left the hospital?

**Informational Support:** What advice or information could have helped you with problems you had after you left the hospital?

Did you delay seeking treatment for the illness that brought you to the hospital? If so, why?

Can you describe somebody you can turn to for support?

Interview template for Aim #1b (Family/Friend Perspective)

**Brief Intervention**

When patient name was in the ICU, did the issue of their alcohol use come up? Can you remember how that happened? If there was a decision to change/not change, in what way were you involved?

How do you think the patient views treatment? How do they view themselves in treatment?

**Probe:** Did you think about bringing up? Had you thought about bringing it up before? Did it come up after patient name was discharged?

In a perfect world, do you think you could be involved in conversations about alcohol use with \_\_\_\_\_ during or after their hospital stay?

**Probe:** What things might get in the way? What things might help?

**Referral to Treatment**

Did \_\_\_\_\_ enter treatment following hospital discharge? Why or why not? What made it easier to enter treatment? What made it harder to enter treatment? What else was going on?

Was \_\_\_\_\_ able to cut down or stop drinking following hospital discharge? What made it easier or harder for them to cut down or stop?

One thing that has come up frequently in interviews from our prior studies is that patients with alcohol-related problems also have mental health problems. Do you think that \_\_\_\_\_ has problems with depression, anxiety, bipolar disorder or another psychiatric illness? In what way does it influence how much they drink? In what ways does it affect their medical care/treatment of their alcohol-related problems? Did they seek treatment for their mental health issues? Why or why not?

What made it easier or harder to seek treatment?

Does the patient have access to the internet? How would they fare with internet involvement as part of their treatment?

Can you describe a time when your friend/family member felt stigmatized because of their drinking?

**Role of Patient Navigator**

Instrumental Support: In what ways could somebody have assisted \_\_\_\_\_ after he/she left the hospital?

Informational Support: What advice or information could have helped \_\_\_\_\_ with their problems after he/she left the hospital?

Emotional Support: Can you think of a time when having emotional support may have helped \_\_\_\_\_?

Validation: Can you describe a time when it may have been helpful for \_\_\_\_\_ to talk to somebody who had a similar experience?
